# Supplementary material for: Poly(ethylene glycol)-graft-poly(vinyl acetate) single-chain nanoparticles for the encapsulation of small molecules
Source: Royal Society of Chemistry journal article supplement (doi:10.1039/c6cp07967a), 2017-01-01
Supplement: c6cp07967a1.pdf [file c6cp07967a1.pdf]

# Electronic Supplementary Information

---

## Poly(ethylene glycol)-*graft*-poly(vinyl acetate) single-chain nanoparticles for the encapsulation of small molecules

*Arianna Bartolini, Paolo Tempesti, Claudio Resta, Debora Berti, Johan Smets, Yousef G. Aouad, and Piero Baglioni\**

|                                                                                              |    |
|----------------------------------------------------------------------------------------------|----|
| DLS and SLS background and analysis models .....                                             | 2  |
| AP1 and AP2 multiangle-DLS .....                                                             | 5  |
| Diameter distribution by Volume of samples AP2, AP5 and AP10 .....                           | 6  |
| <sup>1</sup> H-NMR spectrum of PEG-g-PVAc .....                                              | 7  |
| <sup>13</sup> C-NMR spectrum of PEG-g-PVAc .....                                             | 8  |
| <sup>1</sup> H- <sup>13</sup> C HSQC NMR spectrum of PEG-g-PVAc .....                        | 9  |
| Size Exclusion Chromatography (SEC).....                                                     | 10 |
| SAXS form factors models .....                                                               | 11 |
| SAXS and USAXS of sample AP1 .....                                                           | 13 |
| Cloud points for terpinyl acetate- and limonene-loaded PEG-g-PVAc unimeric micelles<br>..... | 14 |

## DLS and SLS background and analysis models

In DLS experiments the time correlation functions  $G_2(\tau)$  of the scattered light were measured at different angles and the normalized intensity autocorrelation function ( $g_2(q,\tau)$ ) are obtained directly from the software during the measurement.  $g_2(q,\tau)$  is connected to the normalized electric field autocorrelation function  $g_1(q,\tau)$ , by the Siegert relation (Eq. S1)

$$g_2(q,\tau) = 1 + \beta^2 |g_1(q,\tau)|^2 \quad (\text{S1})$$

with  $\beta^2 \leq 1$  a coherence factor that depends on the experimental conditions.

For a suspension of polydisperse Brownian spheres,  $g_1(q,\tau)$  decays exponentially<sup>25</sup>

$$g_1(q,\tau) = \int_0^\infty P(q,D) \exp(-q^2 D \tau) dD \quad (\text{S2})$$

where  $D$  is the diffusion coefficient and  $P(q,D)$  is the intensity-weighted probability distribution function of the diffusion coefficient.

Particle sizing is performed by extracting  $D$  from  $g_2(q,\tau)$  fitting and applying the Stokes-Einstein equation

$$D = \frac{k_B T}{6\pi\eta R_h} \quad (\text{S3})$$

where  $k_B$  is the Boltzmann constant,  $T$  is the absolute temperature,  $\eta$  is the viscosity of the solvent, and  $R_h$  is the hydrodynamic radius of the spheres.

In the SLS experiment the measurements were performed over an angular range between 35° and 135°, performing 10 acquisitions for 1 s at each angle. The scattering vector  $Q$  is calculated according to Eq. S4

$$Q = \left( \frac{4\pi n_d}{\lambda} \right) \sin \frac{\vartheta}{2} \quad (\text{S4})$$

where  $n_d$  is the refractive index of the solvent,  $\lambda$  is the laser wavelength and  $\vartheta$  is the scattering angle.

The measured average intensity ( $I'$ ) is the total counts divided by the duration (units of counts/seconds).  $I'$  is corrected for dark count rate, dead time  $\tau_d$  (for BI-9000AT,  $\tau_d$  is 25 ns) and reflection. The value obtained represents the intensity scattered by all the particles in the scattering volume as observed by the detector optics. To compare the intensity scattered at various angles, the intensity per unit volume ( $I$ ) is calculated according to Eq. S5.

$$I = I' \sin \vartheta \quad (\text{S5})$$

### *Cumulant analysis*

In the classic cumulant method analysis, we have that  $\ln[g_1(q,\tau)]$  is written as a Taylor series in the correlation time

$$\ln[g_1(q,\tau)] = \ln\beta^2 + 2[-\Gamma_1\tau + \frac{\Gamma_2\tau^2}{2!} + \dots + \frac{(-1)\Gamma_n\tau^n}{n!}] \quad (\text{S6})$$

and by stopping to the second order we have

$$\Gamma_1 = Dq^2 \quad (\text{S7})$$

and

$$\Gamma_2 = \frac{\bar{D}^2 - D^2}{D^2} \Gamma_1^2 \quad (\text{S8})$$

where

$$\bar{D}^n = \int_0^\infty D^n P(D) dD \quad (\text{S9})$$

is the  $n$ th order of the intensity-weighted probability distribution function of  $D$  ( $P(D)$ ).

The polydispersity index (PDI) is defined as

$$\sigma^2 = \frac{\Gamma_2}{\Gamma_1^2} \quad (\text{S10})$$

#### *CONTIN analysis*

In the CONTIN analysis method is more precise than the cumulant method when dealing with multimodal polydisperse systems. Detailed information about the CONTIN algorithm is given in (A. Scotti et al., *J. of Chem. Phys.*, **2015**, 142, 234905).

## AP1 and AP2 multiangle-DLS

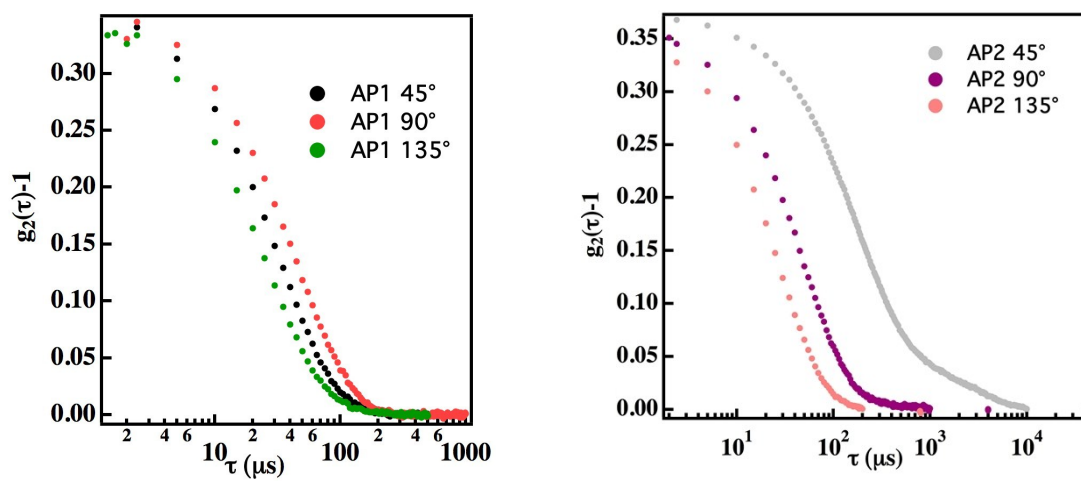

**Figure S1.** DLS autocorrelation curves of AP1 (left) and AP2 (right) at 45°, 90°, and 135°.

## Diameter distribution by Volume of samples AP2, AP5 and AP10

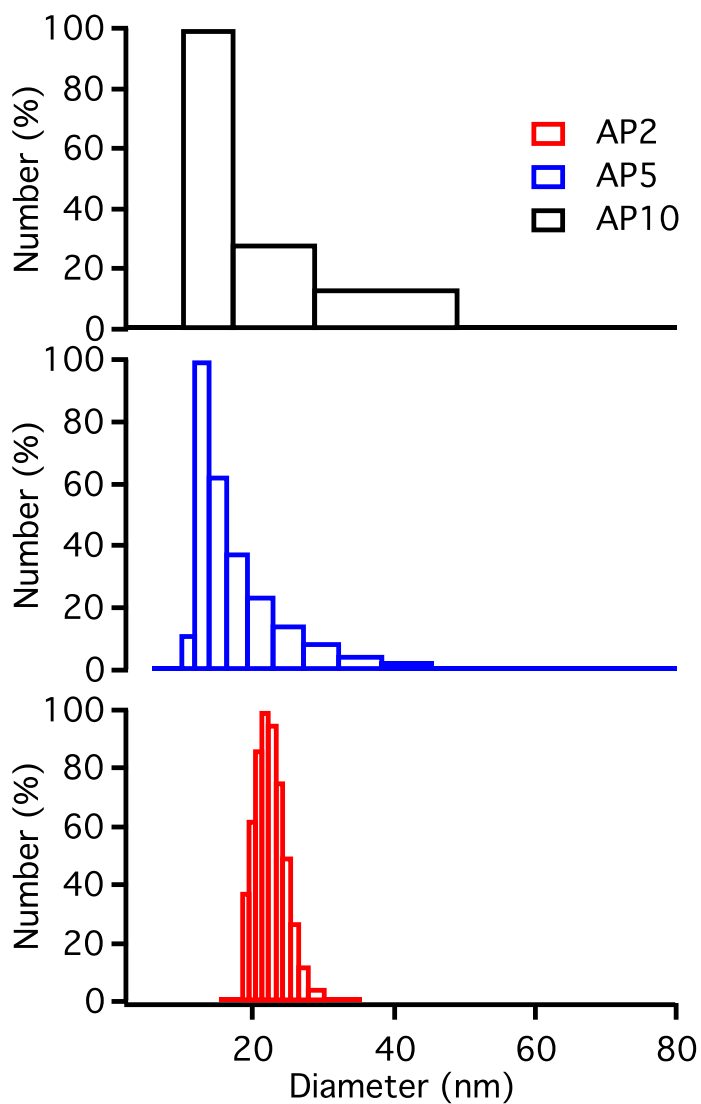

**Figure S2.** Hydrodynamic diameter distribution by number for samples AP2, AP5 and AP10. One major distribution is present for all samples. Aggregates are detected in sample AP10 only and with a very low relative weight ( $\leq 1\%$ ).

## $^1\text{H-NMR}$ spectrum of PEG-g-PVAc

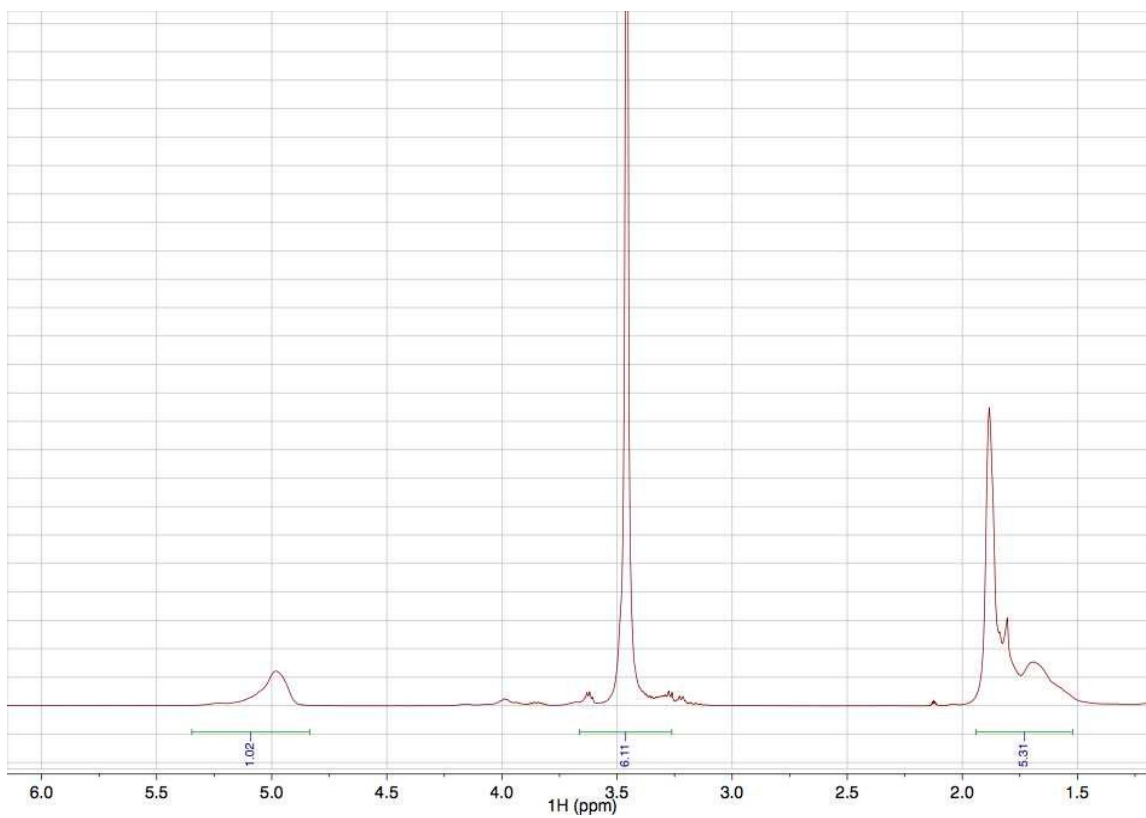

**Figure S3.**  $^1\text{H-NMR}$  spectrum of PEG-g-PVAc in toluene- $d_8$ .

## $^{13}\text{C}$ -NMR spectrum of PEG-g-PVAc

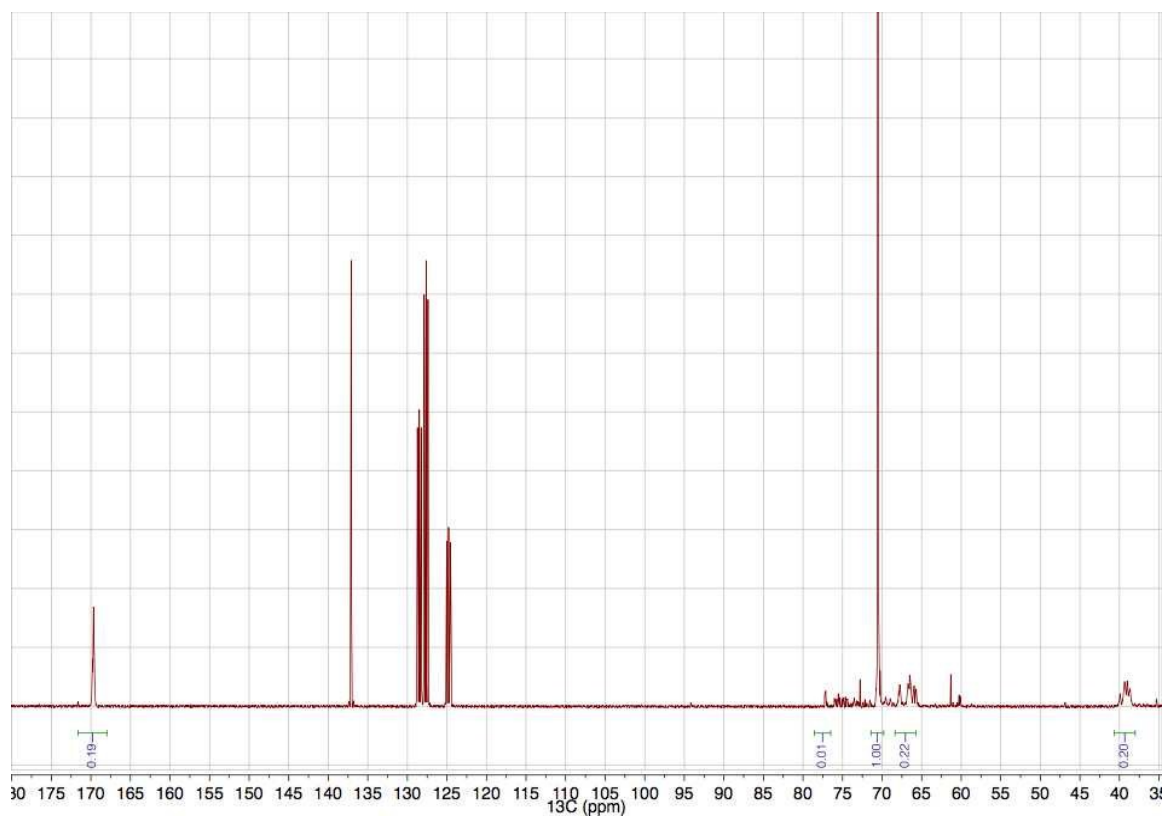

**Figure S4.**  $^{13}\text{C}$ -NMR spectrum of PEG-g-PVAc in toluene- $d_8$ .



## $^1\text{H}$ - $^{13}\text{C}$ HSQC NMR spectrum of PEG-g-PVAc

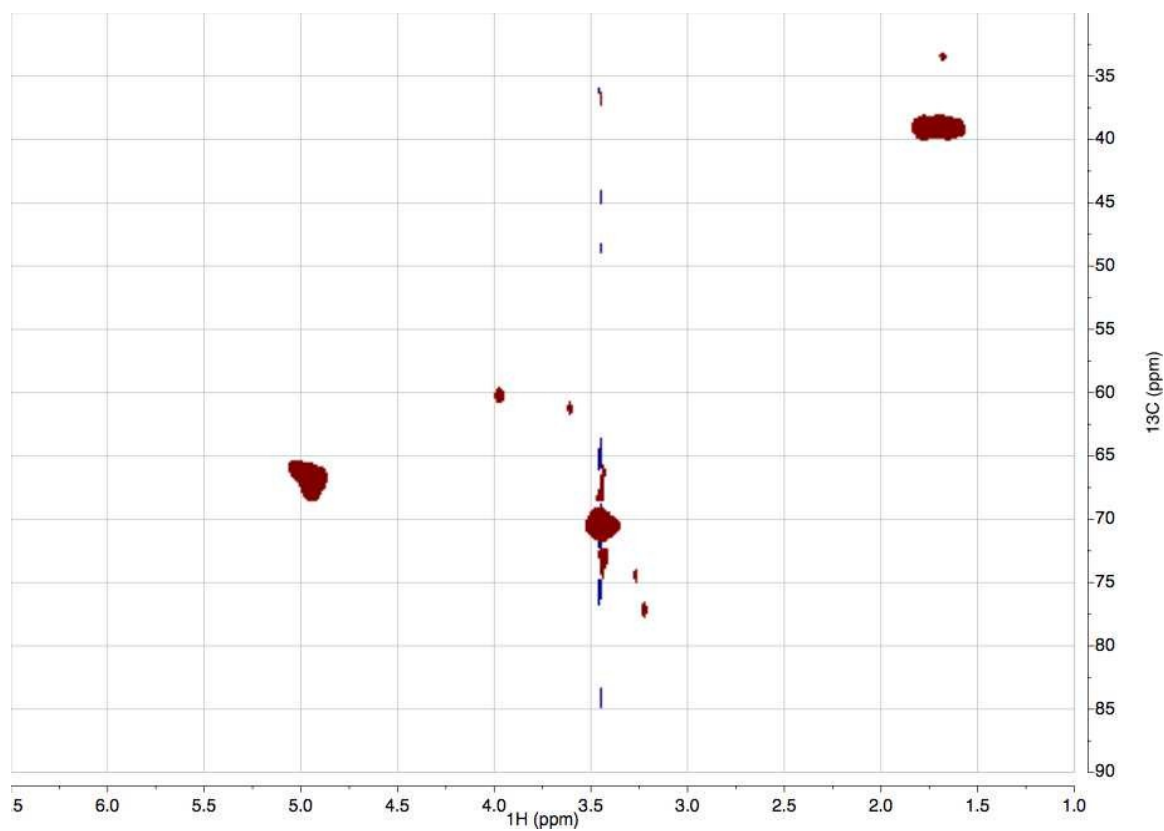

**Figure S5.** HSQC spectrum of PEG-g-PVAc in toluene- $d_8$ .

## Size Exclusion Chromatography (SEC)

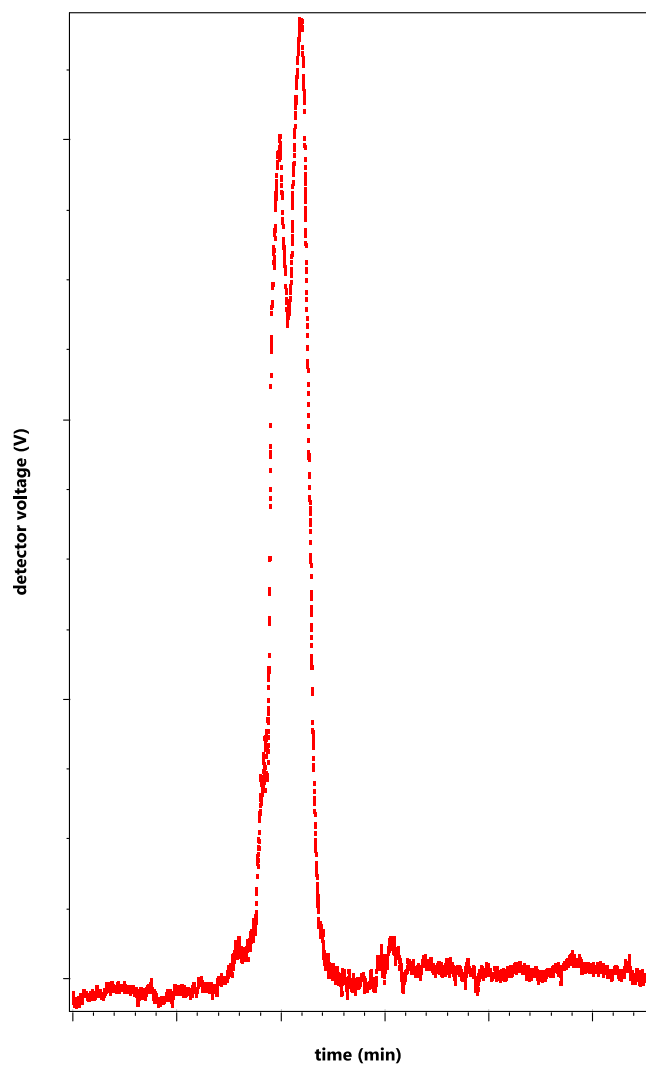

**Figure S6.** SEC-trace of PEG-g-PVAc in THF.

## SAXS form factors models

In a SAXS experiment, the intensity contains information about the shape, size and interactions between scattering objects.

$$I(Q) \propto n_p P(Q) S(Q) + bkg \quad (\text{S11})$$

where  $n_p$  is the number density of the scattering objects,  $P(Q)$  and  $S(Q)$  are respectively the form and the structure factor of the scattering particles, and  $bkg$  represents the incoherent background.

The structure factor  $S(Q)$  equals 1 for diluted samples, while the form factor  $P(Q)$  is sensitive to the shape of the scattering objects.

In all our scattering experiments, the scattering length density of the particles was set equal to  $1.1 \cdot 10^{-5} \text{ \AA}^{-2}$ , while that of water was  $5.9 \cdot 10^{-6} \text{ \AA}^{-2}$ .

### *Polydisperse Spheres*

In the polydisperse spheres model, the probability distribution function for radii of the spheres (Gaussian distribution) is

$$f(R) = \frac{1}{\sigma\sqrt{2\pi}} \exp\left[-\frac{1}{2\sigma^2}(R - R_{avg})^2\right] \quad (\text{S12})$$

where  $R_{avg}$  is the averaged radius and  $p$  is the polydispersity, defined as follows:

$$p = \frac{\sigma}{R_{avg}} \quad (\text{S13})$$

where  $\sigma$  is the variance of the distribution.

In a scattering experiment the returned form factor is normalized by the average particle volume

$$\langle V \rangle = \frac{4\pi}{3} \langle R^3 \rangle (1 + 3p^2) \quad (\text{S14})$$

The radius of gyration,  $R_g$ , is obtained by:

$$R_g = R_{avg} \sqrt{\frac{3}{5}} \frac{(1 + 28p^2 + 210p^4 + 420p^6 + 105p^8)}{(1 + 15p^2 + 45p^4 + 15p^6)} \quad (\text{S15})$$

### *Uniform Ellipsoids*

The form factor for uniform ellipsoids of revolution is

$$P(Q) \propto \Delta\rho^2 \frac{A}{V_{ell}} \quad (\text{S16})$$

where  $A$  is a scale factor,  $\Delta\rho$  is the difference between the scattering length density of the ellipsoid and the solvent, and

$$V_{ell} = \frac{4\pi}{3} R_a R_b^2 \quad (\text{S17})$$

where  $R_a$  is the cross-sectional radius and  $R_b$  the major radius. The ellipsoid is rotated along  $R_a$ .

## SAXS and USAXS of sample AP1

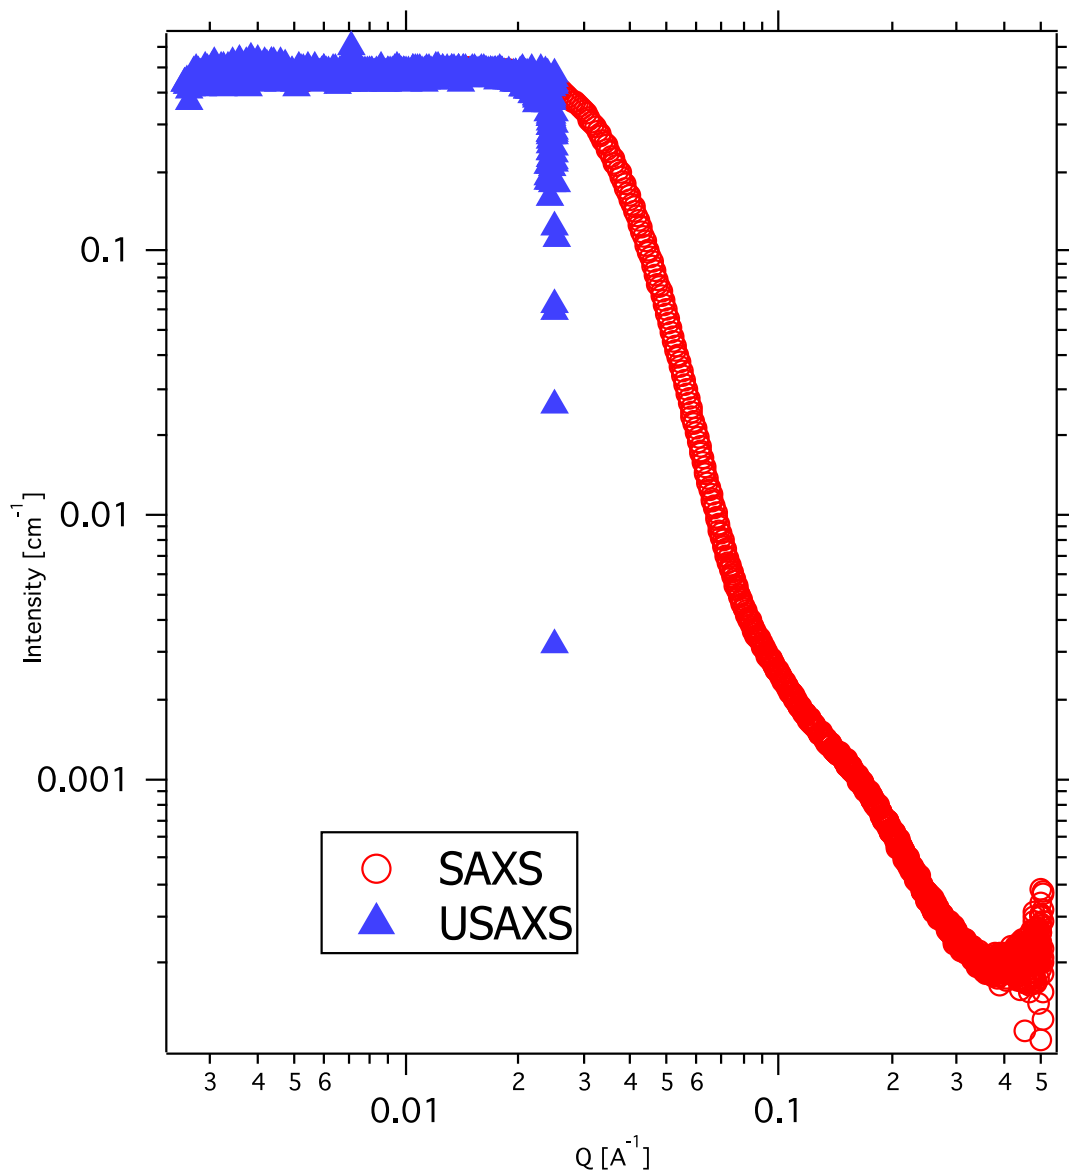

**Figure S7.** SAXS (red circles) and USAXS (blue triangles) curves for sample AP1

## Cloud points for terpinyl acetate- and limonene-loaded PEG-g-PVAc unimeric micelles

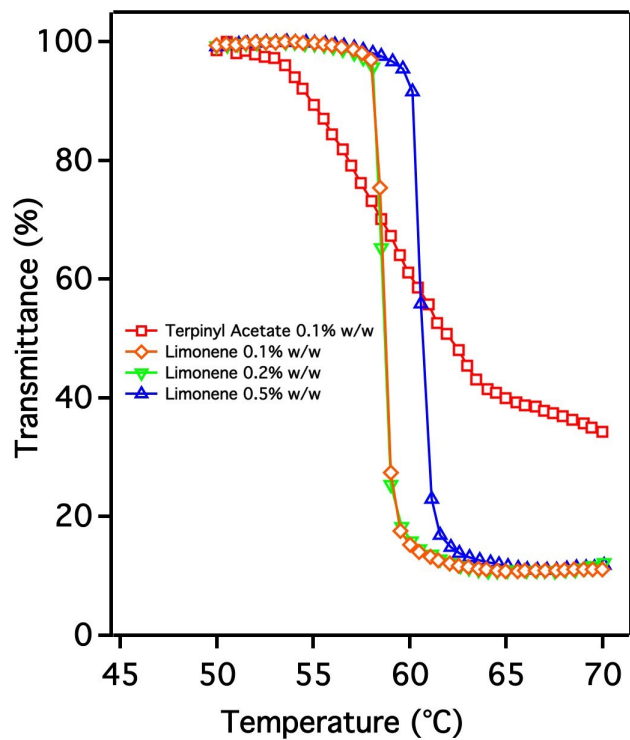

**Figure S8.** Temperature-turbidity spectra for flavor-loaded PEG-g-PVAc unimer micelles. The profile of the terpinyl acetate-loaded sample is due to partial creaming at 25°C.
